# Supplementary material for: Temporal Profiling of the Chromatin Proteome Reveals System-wide Responses to Replication Inhibition
Source: PubMed Central journal article supplement — Curr Biol. 2008 Jun 3;18(11-2):838–43. doi: 10.1016/j.cub.2008.04.075 (PMC2440559; doi:10.1016/j.cub.2008.04.075), 2008-06-03
Supplement: NIHMS1952-supplement-Fig_S1.pdf [file NIHMS1952-supplement-Fig_S1.pdf]

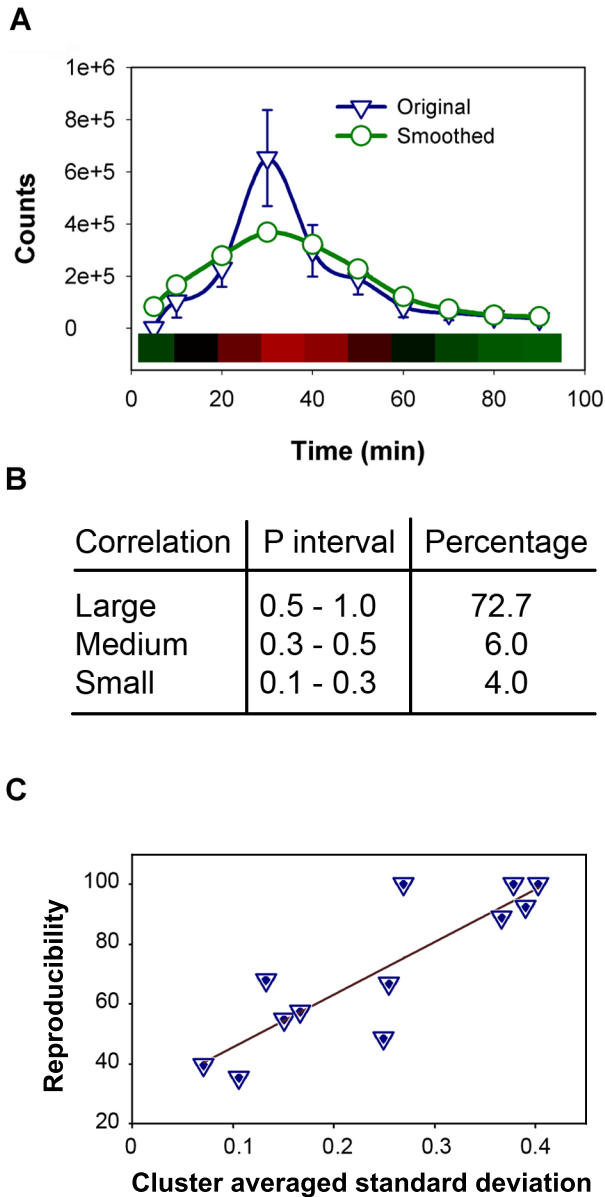

**Figure S1.** Data presentation and reproducibility analysis

(A) Comparison of raw ion current values (blue) and smoothed values for Mcm2.

Below, a heat map of the smoothed values is shown (red highest, green lowest, black intermediate).

(C) Reproducibility of protein behaviour observed in three LCMS runs of untreated chromatin estimated by Pearson coefficient of correlation and graded according to Cohen (COHEN, J. (1988). Statistical power analysis for the behavioral sciences, 2nd Edition (Lawrence Erlbaum Associates)). Coefficients of correlation were calculated pair wise for 276 proteins identified in all three LCMS runs of untreated chromatin.

(B) Regression analysis of correlation between reproducibility of temporal profiles assignment to cluster and amplitude of profiles variation presented by averaged cluster standard deviation. Only proteins identified in all three repeated LCMS analysis of untreated chromatin (276) were used for comparison
