# Supplementary material for: Temporal Profiling of the Chromatin Proteome Reveals System-wide Responses to Replication Inhibition
Source: PubMed Central journal article supplement — Curr Biol. 2008 Jun 3;18(11-2):838–43. doi: 10.1016/j.cub.2008.04.075 (PMC2440559; doi:10.1016/j.cub.2008.04.075), 2008-06-03
Supplement: NIHMS1952-supplement-Fig_S3.pdf [file NIHMS1952-supplement-Fig_S3.pdf]

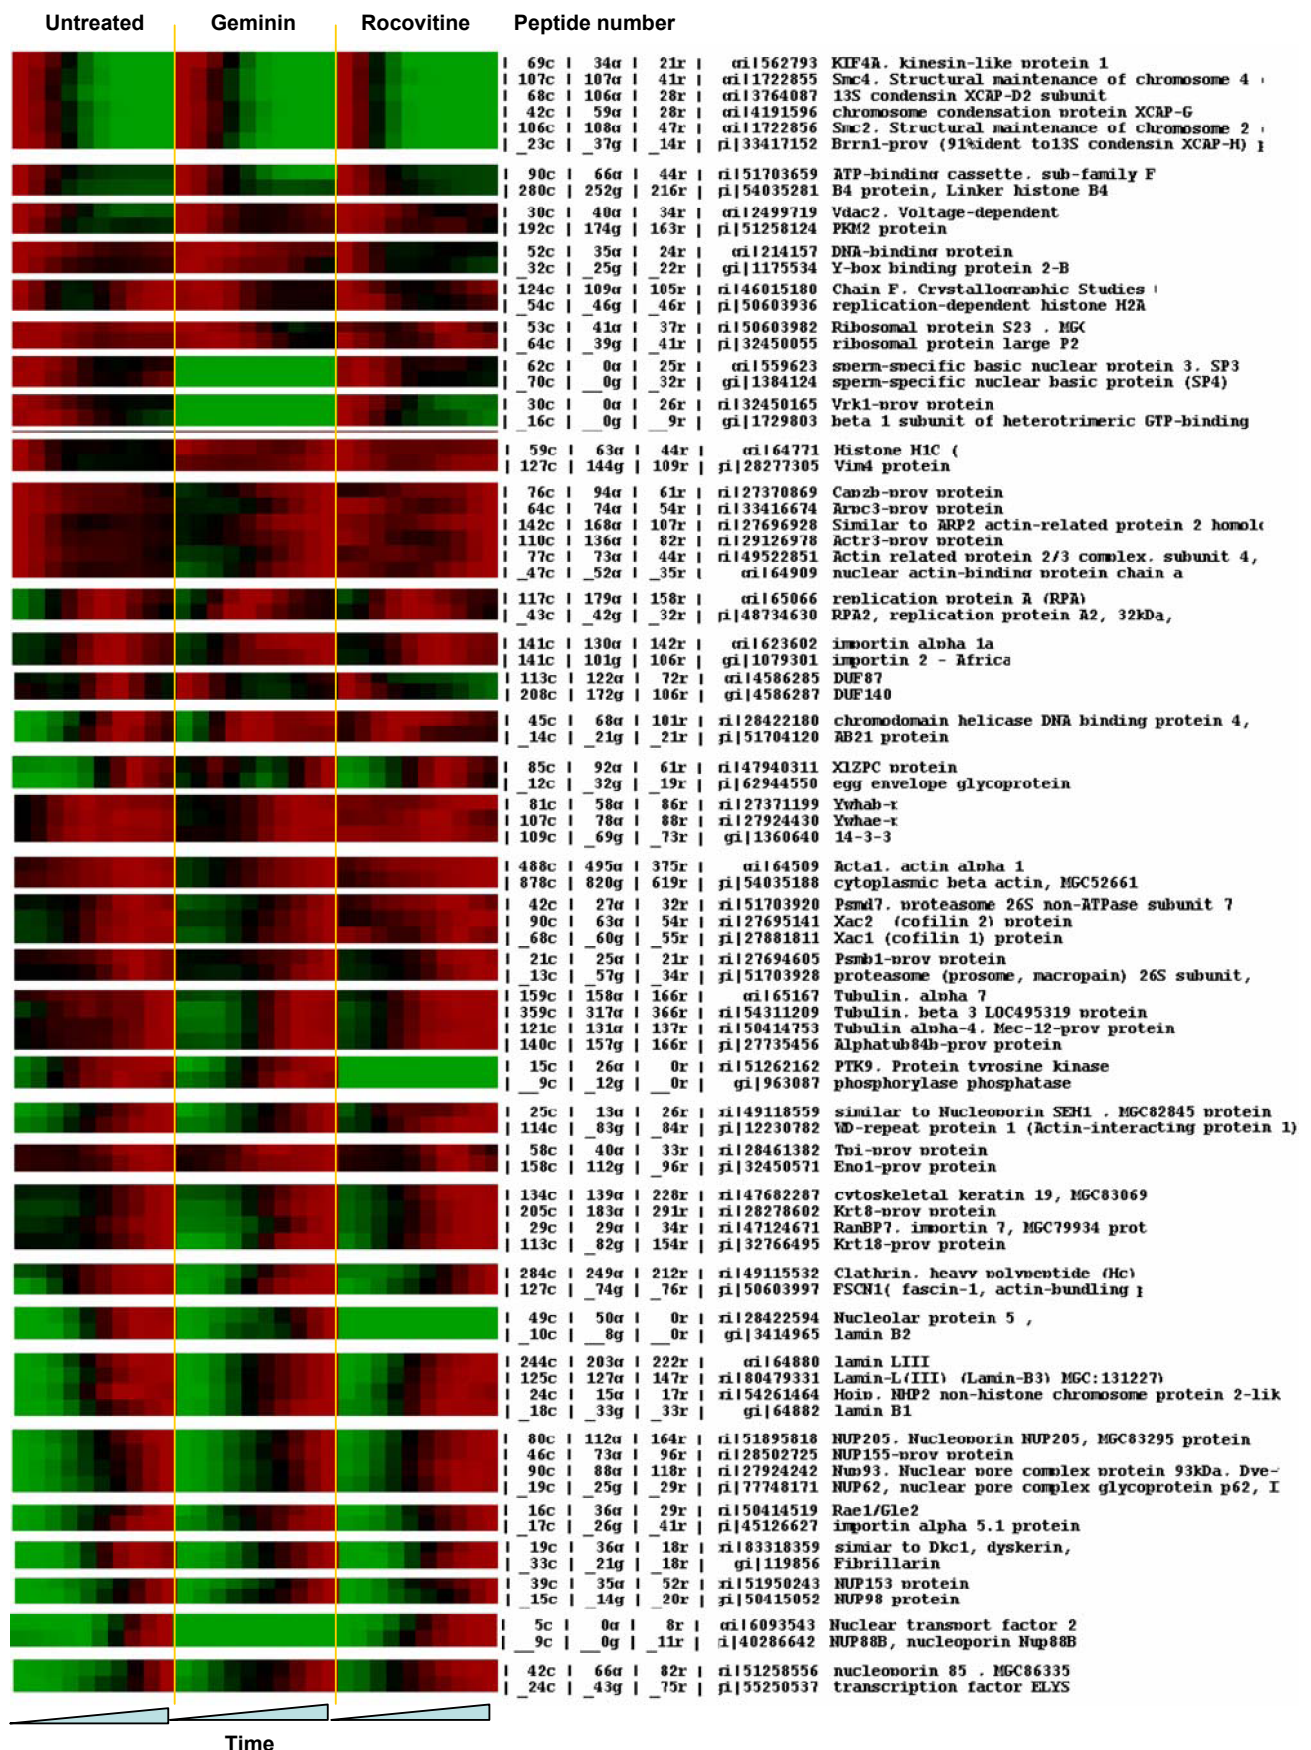

**Figure S3** Protein groups with highly correlated temporal behaviour on interphase chromatin across all experimental treatments (inhibitor-free, geminin and roscovitine).

The combined dataset was generated by integrating profiles from inhibitor-free, geminin and roscovitine experiments for each protein. Hierarchical clustering was performed on complete combined dataset. Branches of hierarchical trees with the correlation level above the threshold defined by the MCM licensing complex are presented. Colour coding: 0.0 - green, 0.5 - black and 1.0 - red. Number of peptides identified for proteins in each treatment is also indicated.
