# Supplementary material for: Temporal Profiling of the Chromatin Proteome Reveals System-wide Responses to Replication Inhibition
Source: PubMed Central journal article supplement — Curr Biol. 2008 Jun 3;18(11-2):838–43. doi: 10.1016/j.cub.2008.04.075 (PMC2440559; doi:10.1016/j.cub.2008.04.075), 2008-06-03
Supplement: NIHMS1952-supplement-Fig_S4.pdf [file NIHMS1952-supplement-Fig_S4.pdf]

A

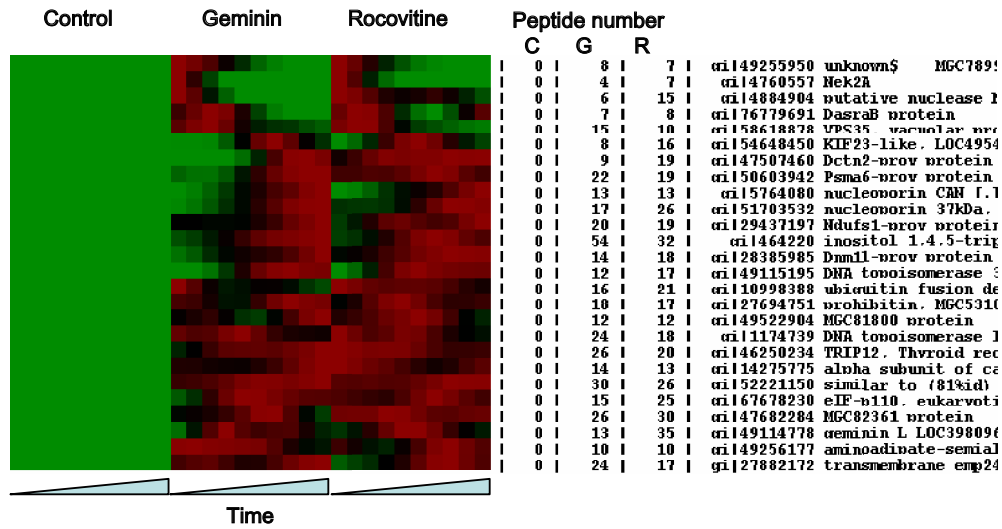

B

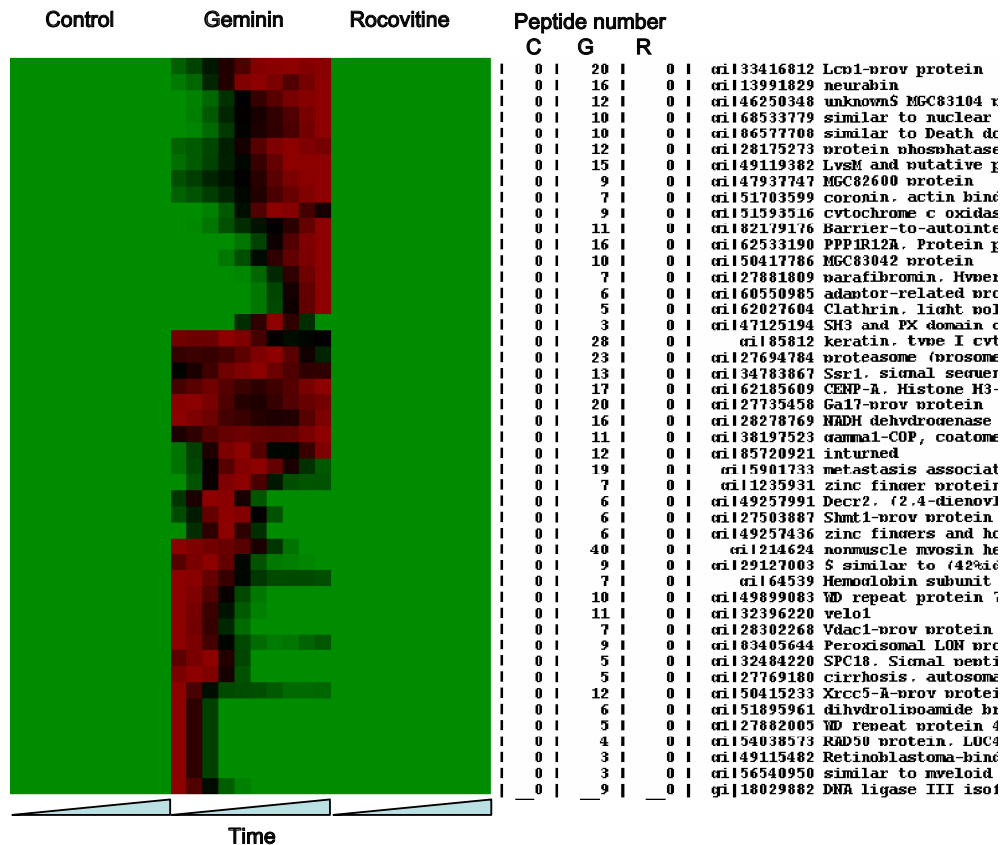

C

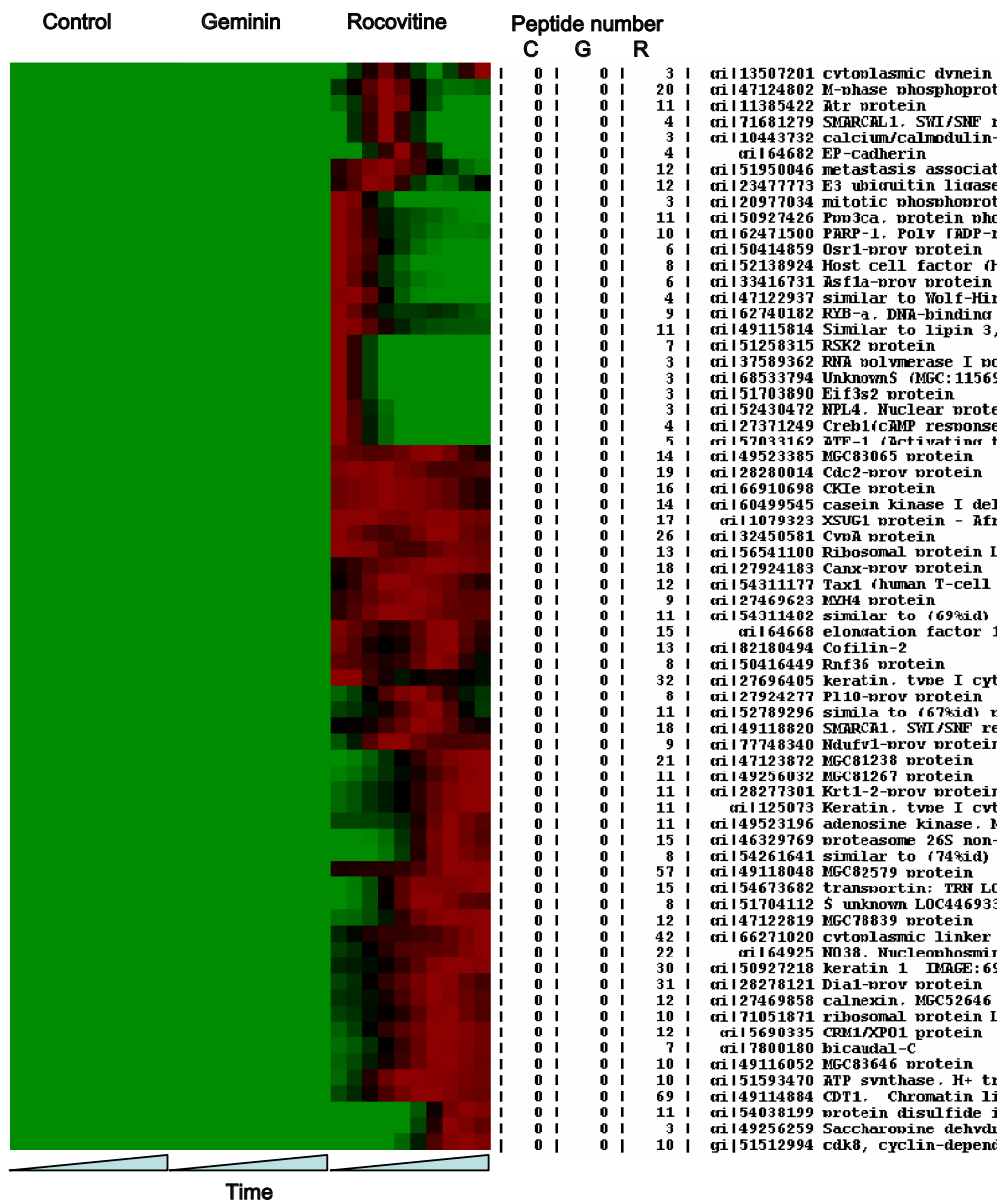

Figure S4. Hierarchical clustering of temporal profiles for proteins identified on chromatin only in the presence of inhibitors

- (A) – proteins, which binding to chromatin was induced by both inhibitors
- (B) - proteins identified on chromatin only in the presence of geminin
- (C) - proteins identified on chromatin only in the presence of roscovitine
